# Supplementary material
Source: MDPI journal article supplement (https://www.mdpi.com/2673-8007/2/4/73)
Supplement: s1 [file s1]

Supplementary Table S1. Sheeppox virus isolates from GenBank used for the genome analysis and primers design.

| Isolate/Strain                                        | Country of origin/Year | GenBank accession number |
|-------------------------------------------------------|------------------------|--------------------------|
| Sheeppox A Kazakhstan 2000                            | Kazakhstan/1987        | AY077833                 |
| Sheeppox virus NISKHI (vaccine)                       | Kazakhstan/1994        | AY077834                 |
| Sheeppox virus TU-V02127                              | Turkey/1977            | NC004002                 |
| Sheeppox virus V293                                   | Egypt/2018             | MW167071                 |
| Sheeppox virus Turkey Vaccine TU-Vac                  | Turkey/Unknown         | MN072631                 |
| Sheeppox virus SAU-SPPV                               | Saudi Arabia/Unknown   | MN072630                 |
| Sheeppox virus Srinagar passage 40 (vaccine)          | India/2000             | MT137384                 |
| Sheeppox virus PE-SPPV                                | Turkey/1983            | MN072629                 |
| Sheeppox virus NIG-SPPV                               | Nigeria/1977           | MN072628                 |
| Sheeppox virus 10700-99 strain TU-V02127              | Turkey/1970            | AY077832                 |
| Sheeppox virus isolate Saudi Arabia SUV-Vac (vaccine) | Saudi Arabia/Unknown   | MN072627                 |
| Sheeppox virus isolate Abu Gharib AG-SPPV             | Iraq/Unknown           | MN072626                 |
| Sheeppox virus M18                                    | Russia, Moscow/2018    | ON961655                 |
| Sheeppox virus M19                                    | Russia, Moscow/2019    | ON961656                 |
| Sheeppox virus Tula 2019                              | Russia, Tula/2019      | ON961657                 |
